# Supplementary material for: Effects of added thiol ligand structure on aggregation of non-aqueous ZnO dispersions and morphology of spin-coated films
Source: Royal Society of Chemistry journal article supplement (doi:10.1039/c4ra15013a), 2015-01-01
Supplement: c4ra15013a1.pdf [file c4ra15013a1.pdf]

## SUPPLEMENTARY INFORMATION

### **Effects of added thiol ligand structure on aggregation of non-aqueous ZnO dispersions and morphology of spin coated films**

Aloïs Mispelon<sup>a</sup>, Amir H. Milani<sup>a</sup>, Junfeng Yan<sup>a</sup>, Mu Chen<sup>a</sup>, Wenkai Wang<sup>a</sup>,

Paul O'Brien<sup>a, b</sup> and Brian R. Saunders<sup>a, \*</sup>

<sup>a</sup>*Polymer Science and Technology Group, School of Materials, The University of Manchester, Grosvenor Street, Manchester, M9 13PL, U.K.*

<sup>b</sup>*School of Chemistry, The University of Manchester, Oxford Road, Manchester, M9 13PL, U.K.*

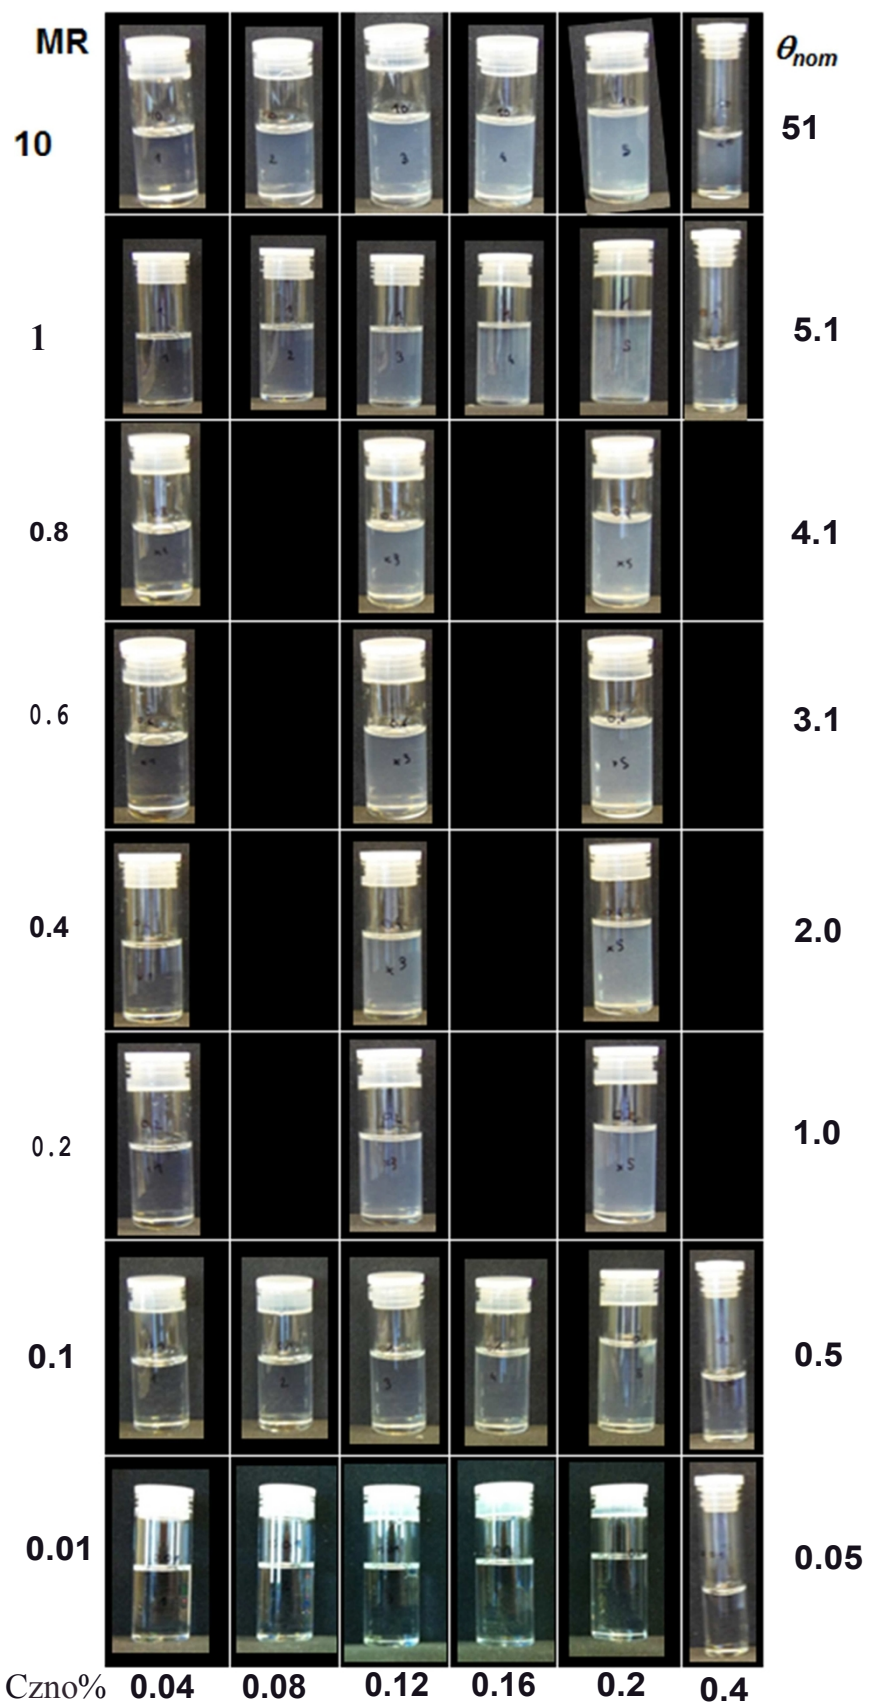

Fig. S1. ZnO/1,2-ethanedithiol dispersion stability. The values for  $C_{zno}$ ,  $MR$  and  $\theta_{nom}$  are shown.

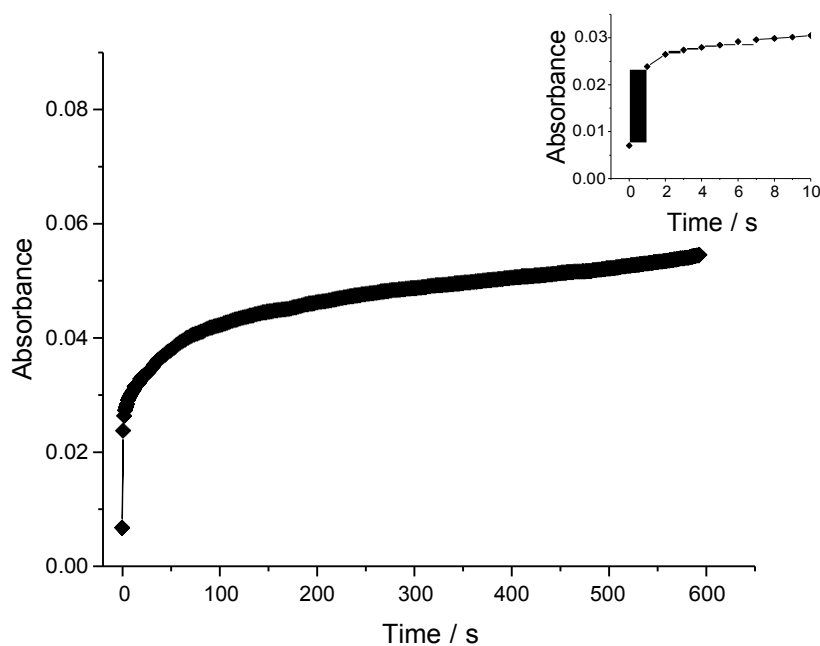

**Fig. S2. Kinetic study of ZnO/1,2-ethanedithiol dispersion aggregation.** The variation of the absorbance measured at 450 nm as a function of time is shown. The conditions used were  $MR = 1.0$  and  $C_{ZnO} = 0.016\%$ .

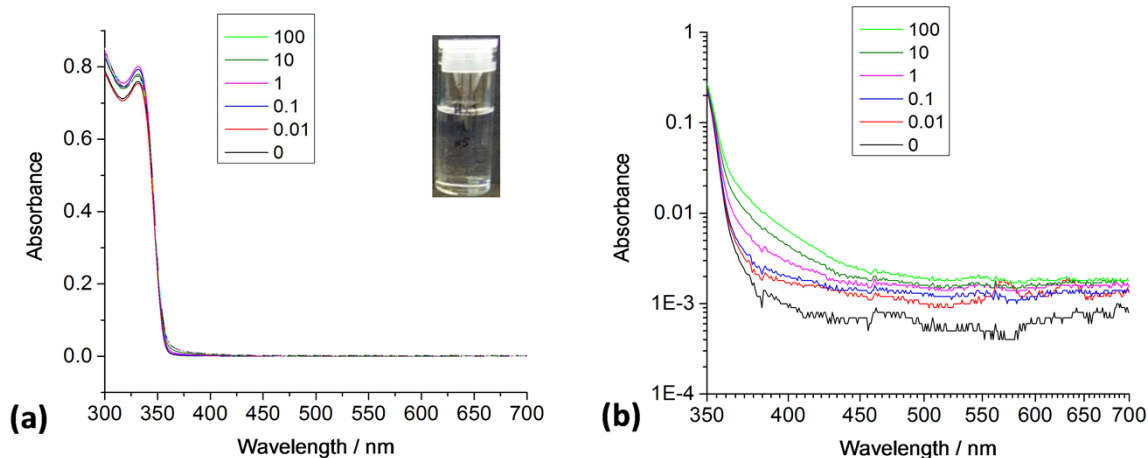

**Fig. S3 Effect of added hexanethiol on the UV-visible spectra for ZnO dispersions.** (a) shows the spectra for ZnO/1-hexanethiol dispersions. (b) shows log-log plots to illustrate particle scattering. The vial shown in (a) contained ZnO/1-hexanethiol with  $MR = 1$  ( $n_{om} = 4$ ) and  $C_{ZnO} = 0.2\%$ .

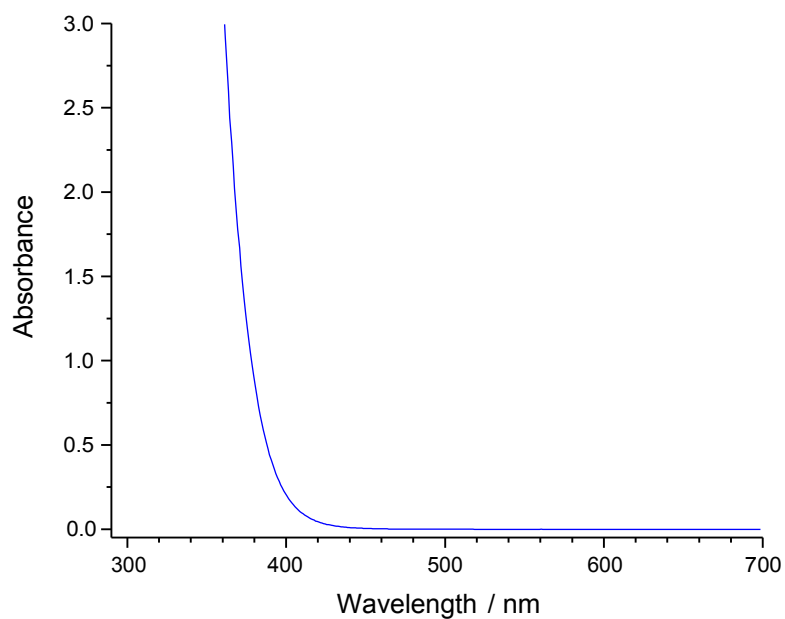

**Fig. S4. UV-visible spectrum of 1,2-benzenedithiol.** The spectrum was obtained using a cosolvent blend of chlorobenzene:methanol (90:10) with a 1,2-benzenedithiol concentration of 0.1 M. The latter is equivalent to  $MR = 100$  (in the case of ZnO/1,2-benzenedithiol).

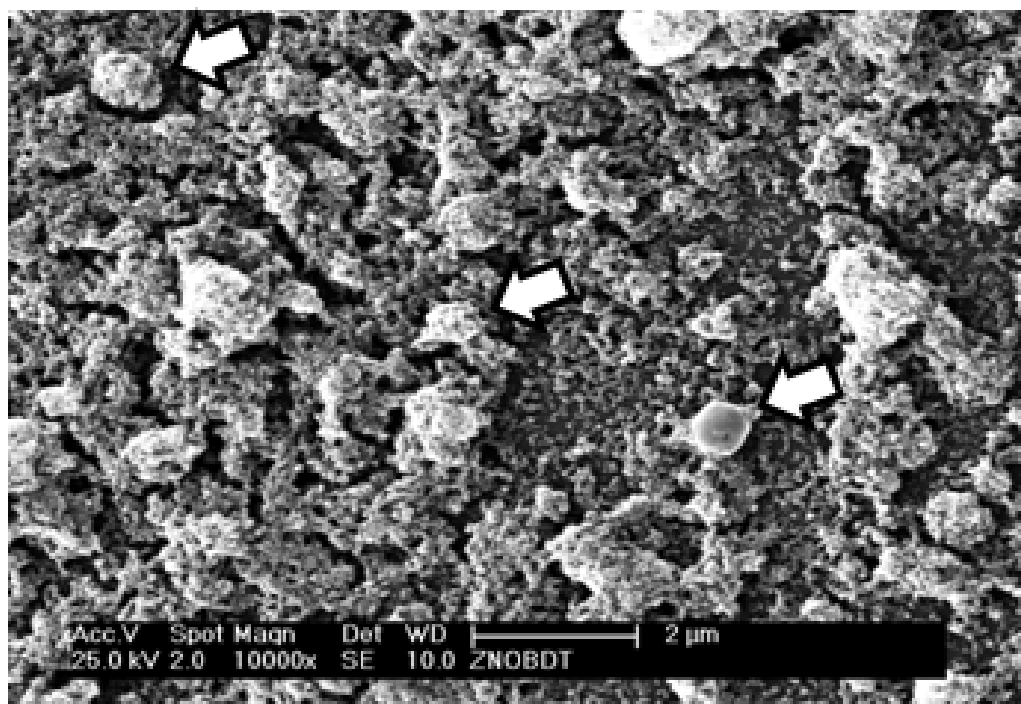

**Fig. S5. SEM images of ZnO/1,2-benzenedithiol film.** The values for  $MR$  and  $C_{ZnO}$  were, respectively 0.2 and 0.16 %. The arrows highlight sub-micrometre sized secondary aggregates.

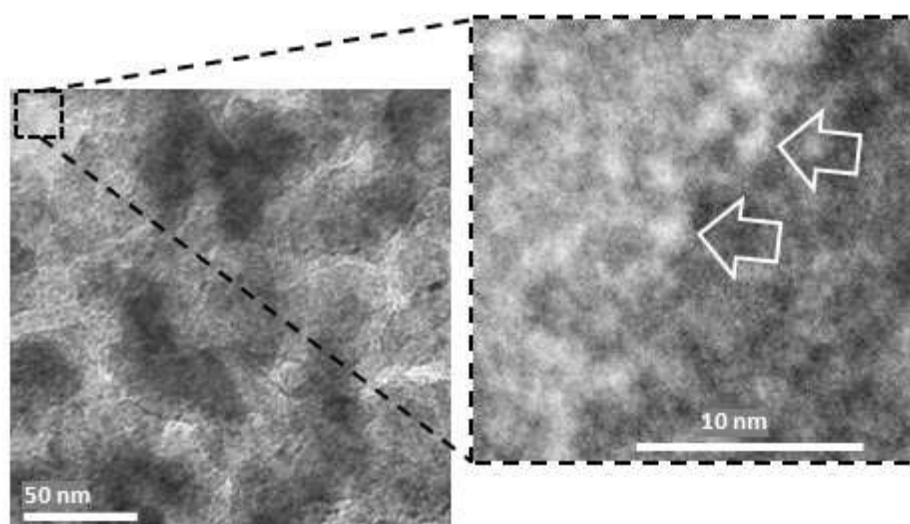

**Fig. S6.** TEM images of ZnO/1,2-benzenedithiol. The arrows highlight ZnO NCs.
